# Supplementary material for: Muscle Glycogen Phosphorylase and Its Functional Partners in Health and Disease
Source: PubMed Central journal article supplement (PMC8070155; doi:10.3390/cells10040883), 2021-04-13
Supplement: cells-10-00883-s001.pdf [file cells-10-00883-s001.pdf]

Table S1. Assembly of phosphorylase, glycogen, muscle (PYGM) biological interactions. Performed within the framework of the Biological General Repository for Interaction Datasets (BioGRID) public database (thebiogrid.org, 20.02.2021) [1].

| Phosphorylase, glycogen, muscle (PYGM) biological interactions |            |                                                  |                 |                    |        |
|----------------------------------------------------------------|------------|--------------------------------------------------|-----------------|--------------------|--------|
| No.                                                            | Interactor |                                                  | Systematic name | Organism           | Source |
| 1                                                              | ABTB2      | ankyrin repeat and BTB (POZ) domain containing 2 | Q8N961          | <i>H. sapiens</i>  | [2]    |
| 2                                                              | AGRN       | agrin                                            | O00468          | <i>H. sapiens</i>  | [3]    |
| 3                                                              | AGTPBP1    | ATP/GTP binding protein 1                        | Q9UPW5          | <i>H. sapiens</i>  | [4]    |
| 4                                                              | ARID1B     | AT rich interactive domain 1B (SWI1-like)        | Q8NFD5          | <i>H. sapiens</i>  | [4]    |
| 5                                                              | BRCA2      | breast cancer 2, early onset                     | P51587          | <i>H. sapiens</i>  | [5]    |
| 6                                                              | CCDC15     | coiled-coil domain containing 15                 | Q8C9M2          | <i>M. musculus</i> | [6]    |
| 7                                                              | CDC42BPB   | CDC42 binding protein kinase beta (DMPK-like)    | Q9Y5S2          | <i>H. sapiens</i>  | [4]    |
| 8                                                              | CLASP2     | cytoplasmic linker associated protein 2          | O75122          | <i>H. sapiens</i>  | [4]    |
| 9                                                              | DEGS1      | delta(4)-desaturase, sphingolipid 1              | MIG15           | <i>H. sapiens</i>  | [7]    |
| 10                                                             | DNM2       | dynamamin 2                                      | P50570          | <i>H. sapiens</i>  | [4]    |
| 11                                                             | FAM110A    | family with sequence similarity 110, member A    | Q9BQ89          | <i>H. sapiens</i>  | [4]    |
| 12                                                             | FANCD2     | Fanconi anemia, complementation group D2         | Q9BXW9          | <i>H. sapiens</i>  | [8]    |
| 13                                                             | GBAS       | glioblastoma amplified sequence                  | O75323          | <i>H. sapiens</i>  | [4]    |
| 14                                                             | GBE1       | glucan (1,4-alpha-), branching enzyme 1          | Q04446          | <i>H. sapiens</i>  | [9]    |
| 15                                                             | IGBP1      | immunoglobulin (CD79A) binding protein 1         | P78318          | <i>H. sapiens</i>  | [4]    |
| 16                                                             | INTS4      | integrator complex subunit 4                     | Q96HW7          | <i>H. sapiens</i>  | [4]    |
| 17                                                             | KRT17      | keratin 17                                       | Q04695          | <i>H. sapiens</i>  | [10]   |
| 18                                                             | LMNA       | lamin A/C                                        | P02545          | <i>H. sapiens</i>  | [4]    |
| 19                                                             | LZTR1      | leucine-zipper-like                              | Q8N653          | <i>H. sapiens</i>  | [2]    |

|    |         |                                                                                              |        |                   |      |
|----|---------|----------------------------------------------------------------------------------------------|--------|-------------------|------|
|    |         | transcription regulator 1                                                                    |        |                   |      |
| 20 | MCM2    | minichromosome maintenance complex component 2                                               | P49736 | <i>H. sapiens</i> | [11] |
| 21 | MECOM   | MDS1 and EVI1 complex locus                                                                  | Q03112 | <i>H. sapiens</i> | [2]  |
| 22 | PACSIN3 | protein kinase C and casein kinase substrate in neurons 3                                    | Q9UKS6 | <i>H. sapiens</i> | [7]  |
| 23 | PDE4DIP | phosphodiesterase 4D interacting protein                                                     | Q5VU43 | <i>H. sapiens</i> | [4]  |
| 24 | PLEKHA4 | pleckstrin homology domain containing, family A (phosphoinositide binding specific) member 4 | Q9H4M7 | <i>H. sapiens</i> | [12] |
| 25 | POMP    | proteasome maturation protein                                                                | Q9Y244 | <i>H. sapiens</i> | [4]  |
| 26 | PPP1CA  | protein phosphatase 1, catalytic subunit, alpha isozyme                                      | P62136 | <i>H. sapiens</i> | [13] |
| 27 | PPP1R3B | protein phosphatase 1, regulatory subunit 3B                                                 | Q86XI6 | <i>H. sapiens</i> | [4]  |
| 28 | PPP2CA  | protein phosphatase 2, catalytic subunit, alpha isozyme                                      | P67775 | <i>H. sapiens</i> | [14] |
| 29 | PRKAB2  | protein kinase, AMP-activated, beta 2 non-catalytic subunit                                  | O43741 | <i>H. sapiens</i> | [15] |
| 30 | PRKAB2  | protein kinase, AMP-activated, beta 2 non-catalytic subunit                                  | O43741 | <i>H. sapiens</i> | [16] |
| 31 | PRKAB2  | protein kinase, AMP-activated, beta 2 non-catalytic subunit                                  | O43741 | <i>H. sapiens</i> | [17] |
| 32 | PYGB    | phosphorylase, glycogen; brain                                                               | P11216 | <i>H. sapiens</i> | [16] |
| 33 | PYGL    | phosphorylase, glycogen, liver                                                               | P06737 | <i>H. sapiens</i> | [16] |
| 34 | S100A1  | S100 calcium binding protein A1                                                              | P23297 | <i>H. sapiens</i> | [18] |
| 35 | S100A1  | S100 calcium binding protein A1                                                              | P23297 | <i>H. sapiens</i> | [18] |
| 36 | SGCG    | sarcoglycan, gamma (35kDa dystrophin-associated glycoprotein)                                | Q13326 | <i>H. sapiens</i> | [4]  |
| 37 | SRP72   | signal recognition particle 72 kDa                                                           | O76094 | <i>H. sapiens</i> | [4]  |

|    |         |                                                             |        |                   |      |
|----|---------|-------------------------------------------------------------|--------|-------------------|------|
| 38 | TLE3    | transducin-like enhancer of split 3                         | Q04726 | <i>H. sapiens</i> | [19] |
| 39 | TOP1    | topoisomerase (DNA) I                                       | P11387 | <i>H. sapiens</i> | [20] |
| 40 | TRAPPC2 | trafficking protein particle complex 2                      | P0DI81 | <i>H. sapiens</i> | [4]  |
| 41 | TRIM54  | tripartite motif containing 54                              | Q9BYV2 | <i>H. sapiens</i> | [4]  |
| 42 | TRIM55  | tripartite motif containing 55                              | Q9BYV6 | <i>H. sapiens</i> | [4]  |
| 43 | TRIM63  | tripartite motif containing 63, E3 ubiquitin protein ligase | Q969Q1 | <i>H. sapiens</i> | [21] |
| 44 | TTN     | titin                                                       | Q8WZ42 | <i>H. sapiens</i> | [4]  |
| 45 | WDYHV1  | WDYHV motif containing 1                                    | Q96HA8 | <i>H. sapiens</i> | [17] |
| 46 | WWP1    | WW domain containing E3 ubiquitin protein ligase 1          | Q9H0M0 | <i>H. sapiens</i> | [1]  |

## References

- [1] Stark, C. BioGRID: A General Repository for Interaction Datasets. *Nucleic Acids Res.*, **2006**, *34* (90001), D535–D539. <https://doi.org/10.1093/nar/gkj109>.
- [2] Huttlin, E. L.; Ting, L.; Bruckner, R. J.; Gebreab, F.; Gygi, M. P.; Szpyt, J.; Tam, S.; Zarraga, G.; Colby, G.; Baltier, K.; et al. The BioPlex Network: A Systematic Exploration of the Human Interactome. *Cell*, **2015**, *162* (2), 425–440. <https://doi.org/10.1016/j.cell.2015.06.043>.
- [3] Rivera, C.; Zandonadi, F. S.; Sánchez-Romero, C.; Soares, C. D.; Granato, D. C.; González-Arriagada, W. A.; Paes Leme, A. F. Agrin Has a Pathological Role in the Progression of Oral Cancer. *Br. J. Cancer*, **2018**, *118* (12), 1628–1638. <https://doi.org/10.1038/s41416-018-0135-5>.
- [4] Blandin, G.; Marchand, S.; Charton, K.; Danièle, N.; Gicquel, E.; Boucheteil, J.-B.; Bentaib, A.; Barrault, L.; Stockholm, D.; Bartoli, M.; et al. A Human Skeletal Muscle Interactome Centered on Proteins Involved in Muscular Dystrophies: LGMD Interactome. *Skelet. Muscle*, **2013**, *3* (1), 3. <https://doi.org/10.1186/2044-5040-3-3>.
- [5] Malik, S.; Saito, H.; Takaoka, M.; Miki, Y.; Nakanishi, A. BRCA2 Mediates Centrosome Cohesion via an Interaction with Cytoplasmic Dynein. *Cell Cycle*, **2016**, *15* (16), 2145–2156. <https://doi.org/10.1080/15384101.2016.1195531>.
- [6] Hutchins, J. R. A.; Toyoda, Y.; Hegemann, B.; Poser, I.; Heriche, J. K.; Sykora, M. M.; Augsborg, M.; Hudecz, O.; Buschhorn, B. A.; Bulkescher, J.; et al. Systematic Analysis of Human Protein Complexes Identifies Chromosome Segregation Proteins. *Science*, **2010**, *328* (5978), 593–599. <https://doi.org/10.1126/science.1181348>.
- [7] Ewing, R. M.; Chu, P.; Elisma, F.; Li, H.; Taylor, P.; Climie, S.; McBroom-Cerajewski, L.; Robinson, M. D.; O'Connor, L.; Li, M.; et al. Large-scale Mapping of Human Protein–Protein Interactions by Mass Spectrometry. *Mol. Syst. Biol.*, **2007**, *3* (1), 89. <https://doi.org/10.1038/msb4100134>.
- [8] Pladevall-Morera, D.; Munk, S.; Ingham, A.; Garribba, L.; Albers, E.; Liu, Y.; Olsen, J. V.; Lopez-Contreras, A. J. Proteomic Characterization of Chromosomal Common Fragile Site (CFS)-Associated Proteins Uncovers ATRX as a Regulator of CFS Stability. *Nucleic Acids Res.*, **2019**, *47* (15), 8004–8018. <https://doi.org/10.1093/nar/gkz510>.

- [9] Wan, C.; Borgeson, B.; Phanse, S.; Tu, F.; Drew, K.; Clark, G.; Xiong, X.; Kagan, O.; Kwan, J.; Bezginov, A.; et al. Panorama of Ancient Metazoan Macromolecular Complexes. *Nature*, **2015**, 525 (7569), 339–344. <https://doi.org/10.1038/nature14877>.
- [10] Yang, L.; Jin, L.; Ke, Y.; Fan, X.; Zhang, T.; Zhang, C.; Bian, H.; Wang, G. E3 Ligase Trim21 Ubiquitylates and Stabilizes Keratin 17 to Induce STAT3 Activation in Psoriasis. *J. Invest. Dermatol.*, **2018**, 138 (12), 2568–2577. <https://doi.org/10.1016/j.jid.2018.05.016>.
- [11] Drissi, R.; Dubois, M.-L.; Douziech, M.; Boisvert, F.-M. Quantitative Proteomics Reveals Dynamic Interactions of the Minichromosome Maintenance Complex (MCM) in the Cellular Response to Etoposide Induced DNA Damage\*. *Mol. Cell. Proteomics*, **2015**, 14 (7), 2002–2013. <https://doi.org/10.1074/mcp.M115.048991>.
- [12] Shami Shah, A.; Batrouni, A. G.; Kim, D.; Punyala, A.; Cao, W.; Han, C.; Goldberg, M. L.; Smolka, M. B.; Baskin, J. M. PLEKHA4/Kramer Attenuates Dishevelled Ubiquitination to Modulate Wnt and Planar Cell Polarity Signaling. *Cell Rep.*, **2019**, 27 (7), 2157–2170.e8. <https://doi.org/10.1016/j.celrep.2019.04.060>.
- [13] Skene-Arnold, T. D.; Luu, H. A.; Uhrig, R. G.; De Wever, V.; Nimick, M.; Maynes, J.; Fong, A.; James, M. N. G.; Trinkle-Mulcahy, L.; Moorhead, G. B.; et al. Molecular Mechanisms Underlying the Interaction of Protein Phosphatase-1c with ASPP Proteins. *Biochem. J.*, **2013**, 449 (3), 649–659. <https://doi.org/10.1042/BJ20120506>.
- [14] Okamoto, K.; Li, H.; Jensen, M. R.; Zhang, T.; Taya, Y.; Thorgeirsson, S. S.; Prives, C. Cyclin G Recruits PP2A to Dephosphorylate Mdm2. *Mol. Cell*, **2002**, 9 (4), 761–771. [https://doi.org/10.1016/S1097-2765\(02\)00504-X](https://doi.org/10.1016/S1097-2765(02)00504-X).
- [15] Corominas, R.; Yang, X.; Lin, G. N.; Kang, S.; Shen, Y.; Ghamsari, L.; Broly, M.; Rodriguez, M.; Tam, S.; Trigg, S. A.; et al. Protein Interaction Network of Alternatively Spliced Isoforms from Brain Links Genetic Risk Factors for Autism. *Nat. Commun.*, **2014**, 5 (1), 3650. <https://doi.org/10.1038/ncomms4650>.
- [16] Luck, K.; Kim, D.-K.; Lambourne, L.; Spirohn, K.; Begg, B. E.; Bian, W.; Brignall, R.; Cafarelli, T.; Campos-Laborie, F. J.; Charloteaux, B.; et al. A Reference Map of the Human Binary Protein Interactome. *Nature*, **2020**, 580 (7803), 402–408. <https://doi.org/10.1038/s41586-020-2188-x>.
- [17] Rolland, T.; Taşan, M.; Charloteaux, B.; Pevzner, S. J.; Zhong, Q.; Sahni, N.; Yi, S.; Lemmens, I.; Fontanillo, C.; Mosca, R.; et al. A Proteome-Scale Map of the Human Interactome Network. *Cell*, **2014**, 159 (5), 1212–1226. <https://doi.org/10.1016/j.cell.2014.10.050>.
- [18] Kiewitz, R.; Acklin, C.; Schäfer, B. W.; Maco, B.; Uhrík, B.; Wuytack, F.; Erne, P.; Heizmann, C. W. Ca<sup>2+</sup>-Dependent Interaction of S100A1 with the Sarcoplasmic Reticulum Ca<sup>2+</sup>-ATPase2a and Phospholamban in the Human Heart. *Biochem. Biophys. Res. Commun.*, **2003**, 306 (2), 550–557. [https://doi.org/10.1016/S0006-291X\(03\)00987-2](https://doi.org/10.1016/S0006-291X(03)00987-2).
- [19] Huttlin, E. L.; Bruckner, R. J.; Paulo, J. A.; Cannon, J. R.; Ting, L.; Baltier, K.; Colby, G.; Gebreab, F.; Gygi, M. P.; Parzen, H.; et al. Architecture of the Human Interactome Defines Protein Communities and Disease Networks. *Nature*, **2017**, 545 (7655), 505–509. <https://doi.org/10.1038/nature22366>.
- [20] Trzcińska, A. M.; Girstun, A.; Piekiełko, A.; Kowalska-Loth, B.; Staroń, K. [No Title Found]. *Mol. Biol. Rep.*, **2002**, 29 (4), 347–352. <https://doi.org/10.1023/A:1021237021338>.
- [21] Hirner, S.; Krohne, C.; Schuster, A.; Hoffmann, S.; Witt, S.; Erber, R.; Sticht, C.; Gasch, A.; Labeit, S.; Labeit, D. MuRF1-Dependent Regulation of Systemic Carbohydrate Metabolism as Revealed from Transgenic Mouse Studies. *J. Mol. Biol.*, **2008**, 379 (4), 666–677. <https://doi.org/10.1016/j.jmb.2008.03.049>.
